# Supplementary material for: Effects of Extraction Process Factors on the Composition and Antioxidant Activity of Blackthorn (Prunus spinosa L.) Fruit Extracts
Source: MDPI journal article supplement (doi:10.3390/antiox12101897), 2023-10-23
Supplement: s1 [file s1]

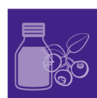

## Article

# Effects of Extraction Process Factors on the Composition and Antioxidant Activity of Blackthorn (*Prunus spinosa* L.) Fruit Extracts

Ana-Maria Drăghici-Popa <sup>1</sup>, Aurelian Cristian Boscornea <sup>2</sup>, Ana-Maria Brezoiu <sup>3</sup>, Ștefan Theodor Tomas <sup>2</sup>, Oana Cristina Pârvulescu <sup>3,\*</sup> and Raluca Stan <sup>1,\*</sup>

<sup>1</sup> Department of Organic Chemistry, National University of Science and Technology POLITEHNICA Bucharest, 1-7 Gheorghe Polizu St., 011061 Bucharest, Romania; ana\_maria.draghici@upb.ro

<sup>2</sup> Department of Bioresources and Polymer Science, National University of Science and Technology POLITEHNICA Bucharest, 1-7 Gheorghe Polizu St., 011061 Bucharest, Romania; cristian.boscornea@upb.ro (A.C.B.); aastomas@hotmail.com (Ș.T.T.)

<sup>3</sup> Department of Chemical and Biochemical Engineering, National University of Science and Technology POLITEHNICA Bucharest, 1-7 Gheorghe Polizu St., 011061 Bucharest, Romania; anamaria.brezoiu@gmail.com

\* Correspondence: oana.parvulescu@yahoo.com (O.C.P.); raluca.stan@upb.ro (R.S.)

## Supplementary Materials

Table S1. HPLC-PDA characterization of a standard solution mixture.

| Compound                      | $\lambda$ max (nm) | Retention time (min) | Calibration curve     | $R^2$  | LOD/LOQ (mg/L) | Linearity domain (mg/L) |
|-------------------------------|--------------------|----------------------|-----------------------|--------|----------------|-------------------------|
| Gallic acid                   | 271                | 3.70                 | $y=8371.14x-1207.10$  | 0.9996 | 0.11/0.54      | 0.54-108.00             |
| Protocatechuic acid           | 279                | 7.16                 | $y=9007.30x-1186.03$  | 0.9998 | 0.10/0.49      | 0.49-98.80              |
| Caftaric acid                 | 326                | 10.92                | $y=3741.63x-1004.52$  | 0.9990 | 0.10/0.50      | 0.50-100.00             |
| Catechin hydrate              | 279                | 12.65                | $y=1704.55x-1484.97$  | 0.9987 | 0.52/1.04      | 0.52-104.00             |
| Chlorogenic acid              | 326                | 13.39                | $y=7634.01x-1686.39$  | 0.9992 | 0.10/0.49      | 0.49-99.00              |
| Vanillic acid                 | 292                | 15.12                | $y=8457.44x-1216.69$  | 0.9995 | 0.10/0.49      | 0.49-98.70              |
| Caffeic acid                  | 323                | 15.38                | $y=13188.1x-1501.42$  | 0.9994 | 0.10/0.49      | 0.49-99.00              |
| Syringic acid                 | 271                | 16.80                | $y=6929.03x-667.27$   | 0.9991 | 0.11/0.54      | 0.54-107.30             |
| (-) Epicatechin               | 279                | 17.76                | $y=1585.49x-273.15$   | 0.9993 | 0.47/0.94      | 0.94-93.50              |
| Delphinidin chloride          | 529                | 21.21                | $y=13373.70x-5554.22$ | 0.9984 | 0.11/0.59      | 0.59-118.00             |
| <i>trans p</i> -Coumaric acid | 309                | 22.17                | $y=18220.60x-1642.10$ | 0.9972 | 0.10/0.51      | 0.51-102.00             |
| <i>Trans</i> -ferulic acid    | 323                | 25.46                | $y=13317.51x-3135.95$ | 0.9997 | 0.10/0.52      | 0.52-104.00             |
| Ellagic acid dihydrate        | 367                | 25.62                | $y=5128.27x-577.18$   | 0.9995 | 0.10/0.51      | 0.51-71.12              |
| Cyanidin chloride             | 524                | 25.67                | $y=13401.60x-2555.96$ | 0.9990 | 0.08/0.42      | 0.42-84.00              |
| Rutin hydrate                 | 355                | 26.60                | $y=3813.02x-838.902$  | 0.9992 | 0.49/0.99      | 0.99-99.80              |
| Chicoric acid                 | 330                | 29.18                | $y=10560.62x-1939.03$ | 0.9996 | 0.10/0.51      | 0.51-101.60             |
| Pelargonidin chloride         | 512                | 29.64                | $y=8921.84x-2511.85$  | 0.9993 | 0.10/0.50      | 0.50-100.00             |
| Malvidin chloride             | 535                | 30.90                | $y=7243.86x-2363.29$  | 0.9983 | 0.09/0.46      | 0.46-92.00              |
| Myricetin                     | 373                | 31.87                | $y=9150.32x-1464.36$  | 0.9995 | 0.10/0.48      | 0.48-95.00              |
| Rosmarinic acid               | 330                | 32.36                | $y=7282.31x-633.293$  | 0.9988 | 0.10/0.49      | 0.49-99.00              |
| <i>trans</i> -Resveratrol     | 307                | 33.32                | $y=17601.10x-2585.25$ | 0.9994 | 0.100/0.50     | 0.50-100.00             |
| Quercetin                     | 371                | 34.87                | $y=9898.83x-723.173$  | 0.9997 | 0.10/0.49      | 0.49-99.00              |
| Kaempferol                    | 367                | 35.88                | $y=10549.70x-1296.00$ | 0.9990 | 0.10/0.48      | 0.48-97.00              |

(LOD) limit of detection; (LOQ) limit of quantification.

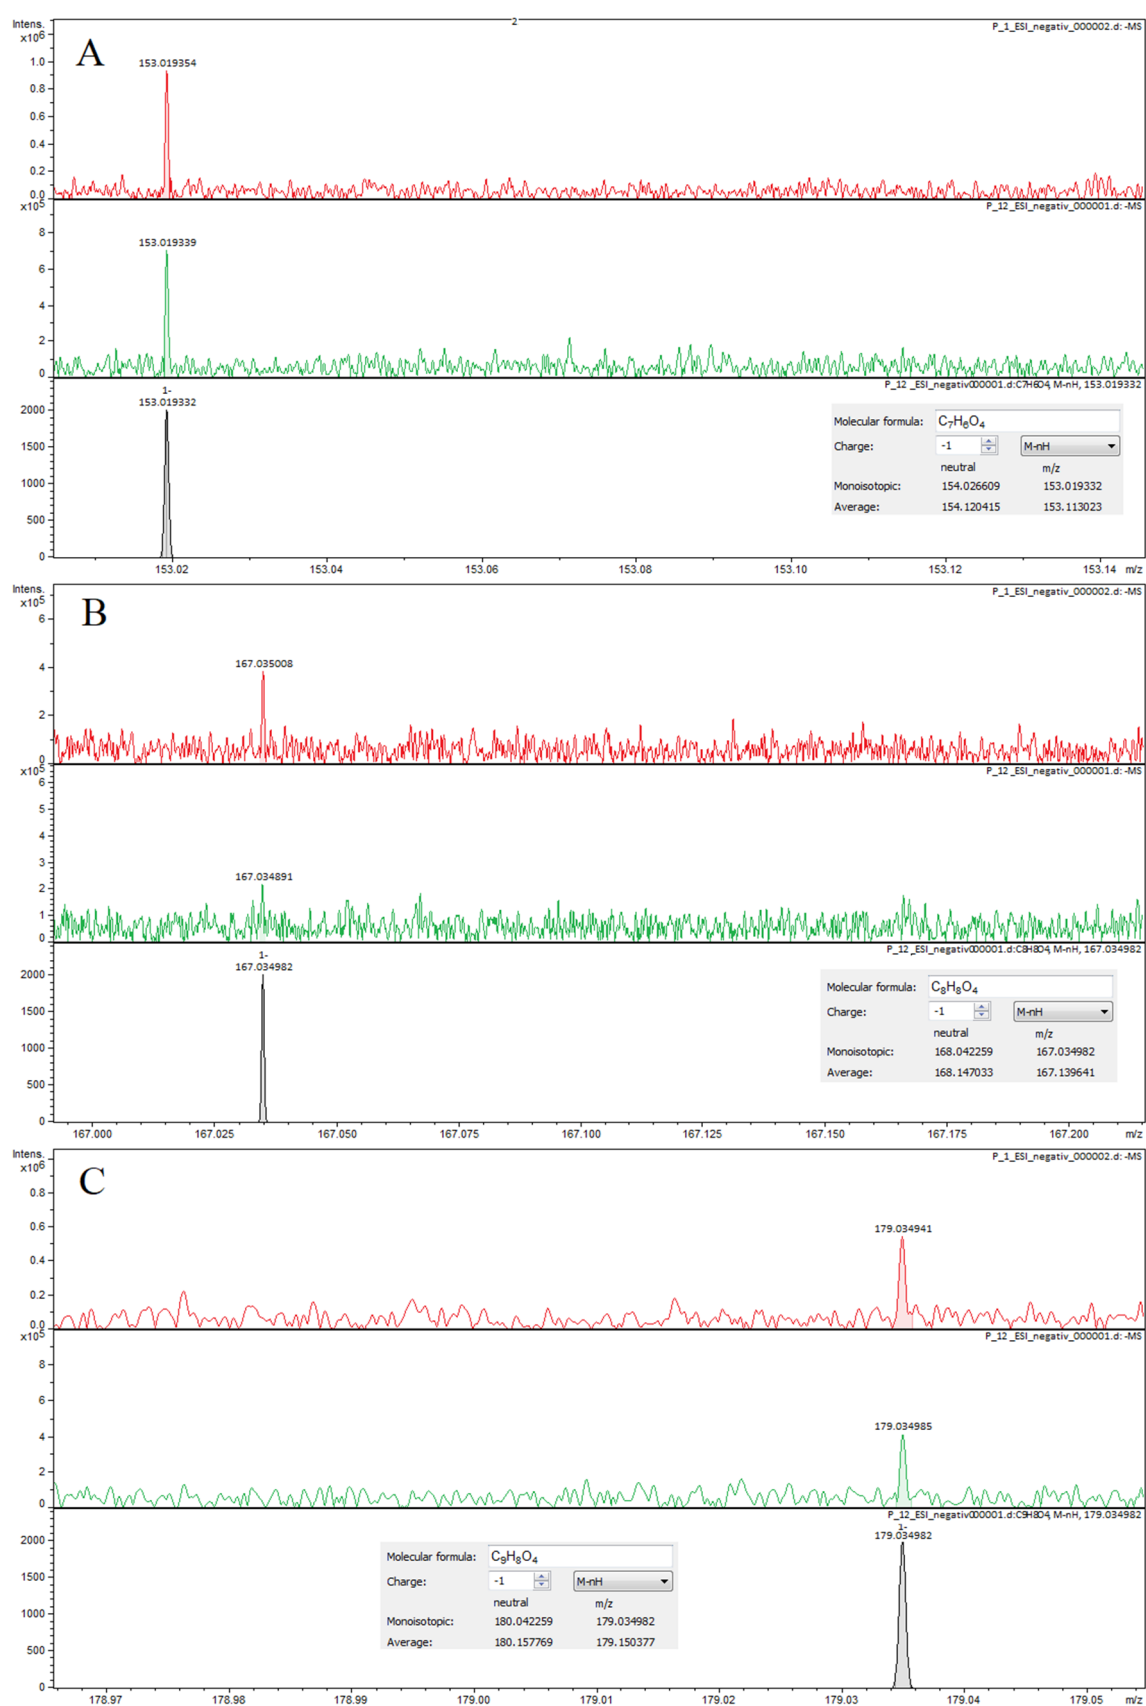

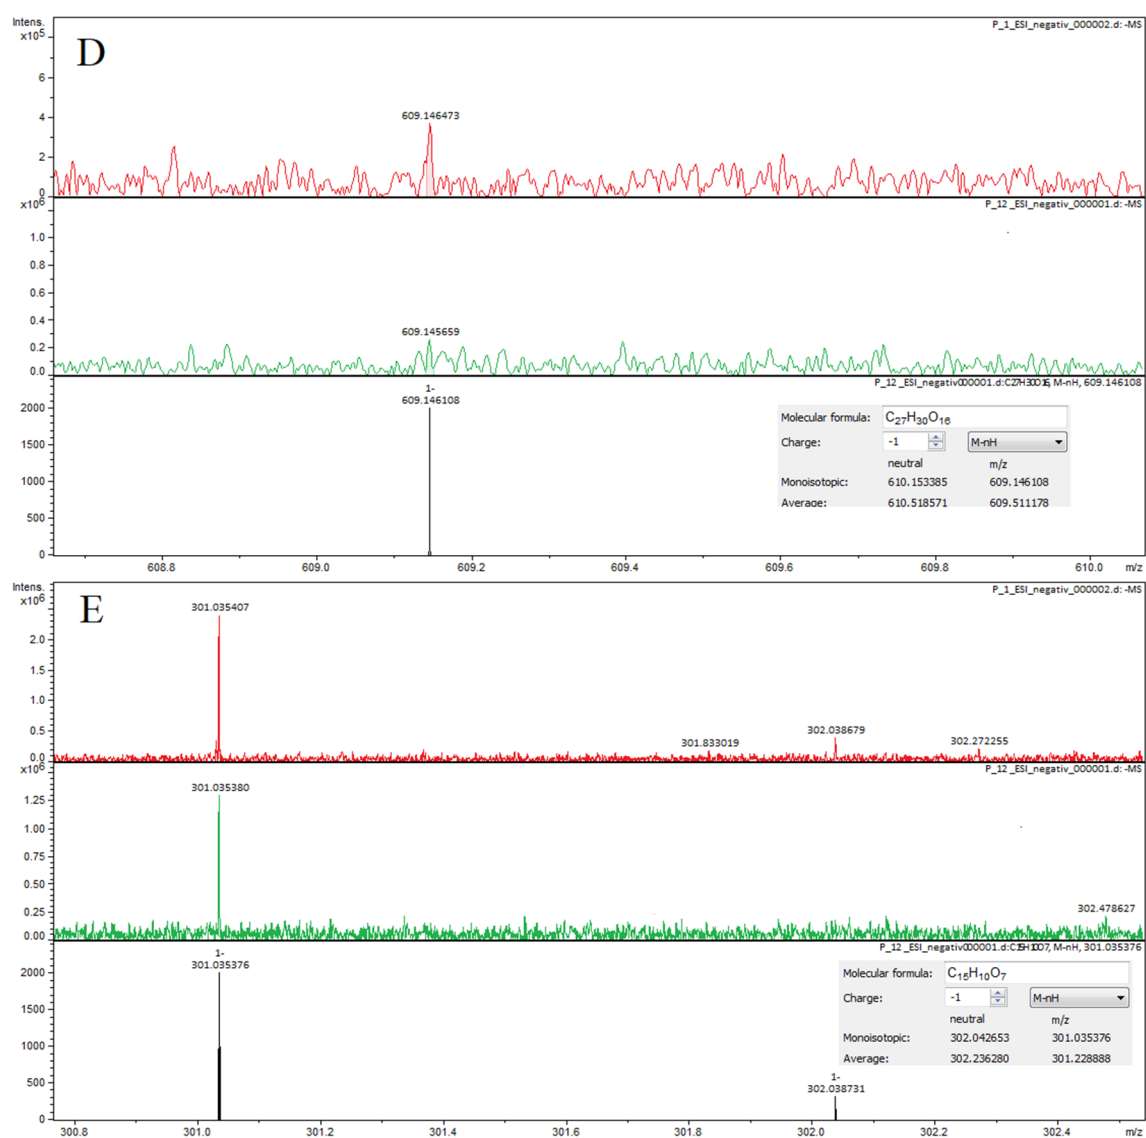

**Figure S1.** Experimental (red for sample P1 and green for sample P12) and predicted (black) FT-ICR-MS spectra with negative ion mode ESI; (A) protocatechuic acid; (B) vanillic acid; (C) caffeic acid; (D) rutin; (E) quercetin.
